# Supplementary material
Source: PubMed Central journal article supplement (PMC6086769)
Supplement: NIHMS941891-supplement-supplement_1.pdf [file NIHMS941891-supplement-supplement_1.pdf]

**Supplemental Table 1: ICD-9CM codes used in study methodology for diagnosis of PG, associated comorbidities, and exclusion of similar diagnoses, and procedure codes**

|                                                                                                       | <b>ICD-9 Codes</b>        | <b>NIS Variables</b> |
|-------------------------------------------------------------------------------------------------------|---------------------------|----------------------|
| PG                                                                                                    | 686.01                    | DX1-DX25             |
| IBD                                                                                                   | 555.xx, 556.xx            | DX1-DX25             |
| Acute myeloid leukemia                                                                                | 205.xx, 206.xx, 208.xx    | DX1-DX25             |
| Multiple myeloma                                                                                      | 203.xx                    | DX1-DX25             |
| Vasculitis and Henoch Schonlein Purpura                                                               | 287.xx                    | DX1-DX25             |
| Inflammatory Arthritis                                                                                | 714.xx                    | DX1-DX25             |
| Monoclonal gammopathy of unknown significance                                                         | 273.1                     | DX1-DX25             |
| Strep carriage, chronic tonsillitis, and non-acute infections                                         | 034.0, 038.0, 463, 474.xx | DX1-DX25             |
| Hypergammaglobulinemia                                                                                | 273.xx; 289.89            | DX1-DX25             |
| Intestinal blind loop syndrome                                                                        | 579.2                     | DX1-DX25             |
| Sepsis                                                                                                | 038.xx                    | DX1-DX25             |
| Systemic inflammatory response syndrome                                                               | 995.91, 995.92            | DX1-DX25             |
| Stoma complications                                                                                   | 569.xx                    | DX1-DX25             |
| Unspecified interstitial pneumonitis                                                                  | 495.9                     | DX1-DX25             |
| Other specified alveolar and pareitoalveolar pneumonopathies cavitary pneumonia                       | 516.8                     | DX1-DX25             |
| Ocular complications                                                                                  | 379.xx                    | DX1-DX25             |
| Amputation stump complication                                                                         | 997.6x                    | DX1-DX25             |
| Skin graft complication                                                                               | 996.52, 996.55            | DX1-DX25             |
| Flap/surgical wound complication                                                                      | 998.31                    | DX1-DX25             |
| Skin graft                                                                                            | E878.2                    | ECODE1-ECODE4        |
|                                                                                                       | 86.6x                     | PR1-PR15             |
| Pedicle grafts/flap                                                                                   | 86.7x                     | PR1-PR15             |
| Amputation                                                                                            | E878.5                    | ECODE1-ECODE4        |
| Skin biopsy                                                                                           | 86.11                     | PR1-PR15             |
| Stoma relocation/revision                                                                             | E878.3                    | ECODE1-ECODE4        |
|                                                                                                       | 46.4x                     | PR1-PR15             |
| Hyperbaric oxygen                                                                                     | 93.95                     | PR1-PR15             |
| Debridement                                                                                           | 86.22, 86.28              | PR1-PR15             |
| Intra-lesional injection                                                                              | 83.98                     | PR1-PR15             |
| Granulomatosis with polyangiitis and related conditions / Polyarteritis nodosa and related conditions | 446.xx                    | DX1-DX25             |
| Sporotrichosis and deep cutaneous fungal infections                                                   | 114.xx-117.xx             | DX1-DX25             |
| Anaplastic large cell lymphoma, cutaneous t-cell lymphoma, peripheral t-cell lymphomas                | 200.6, 202.xx             | DX1-DX25             |
| Leukemia Curtis                                                                                       | 709.8                     | DX1-DX25             |
| Langerhans cell histiocytosis                                                                         | 202.xx                    | DX1-DX25             |
| Anti-phospholipid antibody syndrome / Livedoid vasculopathy                                           | 289.81                    | DX1-DX25             |
| Wound Infection                                                                                       | 686.xx                    | DX1-DX25             |

|               |        |          |
|---------------|--------|----------|
| Cellulitis    | 682.xx | DX1-DX25 |
| Chronic Wound | 707.xx | DX1-DX25 |

---

**Supplemental Table 2:** Demographics of 31 885 patient hospitalizations for pyoderma gangrenosum

|                                        | <b>PG Patients<br/>N = 31,885</b> |        |
|----------------------------------------|-----------------------------------|--------|
| <b>Age (mean, SE)</b>                  | 55.31                             | 0.31   |
| <b>Gender</b>                          |                                   |        |
| <b>Male</b>                            | 10,474                            | 32.87% |
| <b>Female</b>                          | 21,386                            | 67.13% |
| <b>Race</b>                            |                                   |        |
| <b>White</b>                           | 18,139                            | 56.89% |
| <b>Black</b>                           | 4,444                             | 13.94% |
| <b>Hispanic</b>                        | 1,721                             | 5.40%  |
| <b>Other</b>                           | 7,580                             | 23.77% |
| <b>Income quartile</b>                 |                                   |        |
| <b>1</b>                               | 7,824                             | 25.03% |
| <b>2</b>                               | 8,089                             | 25.87% |
| <b>3</b>                               | 7,791                             | 24.92% |
| <b>4</b>                               | 7,559                             | 24.18% |
| <b>Type of insurance</b>               |                                   |        |
| <b>Medicare</b>                        | 14,568                            | 45.81% |
| <b>Medicaid</b>                        | 4,005                             | 12.59% |
| <b>Private</b>                         | 10,361                            | 32.58% |
| <b>Other</b>                           | 2,867                             | 9.02%  |
| <b>Hospital type</b>                   |                                   |        |
| <b>Rural</b>                           | 3,058                             | 9.65%  |
| <b>Urban nonteaching</b>               | 12,059                            | 38.06% |
| <b>Urban teaching</b>                  | 16,566                            | 52.29% |
| <b>Hospital size</b>                   |                                   |        |
| <b>Small</b>                           | 3,302                             | 10.42% |
| <b>Medium</b>                          | 6,761                             | 21.34% |
| <b>Large</b>                           | 21,619                            | 68.24% |
| <b>Hospital region</b>                 |                                   |        |
| <b>Northeast</b>                       | 5,924                             | 18.58% |
| <b>Midwest</b>                         | 7,860                             | 24.65% |
| <b>South</b>                           | 12,563                            | 39.40% |
| <b>West</b>                            | 5,537                             | 17.37% |
| <b>Elixhauser comorbidity score</b>    |                                   |        |
| <b>&lt;3</b>                           | 16,886                            | 66.43% |
| <b>≥3</b>                              | 8,534                             | 33.57% |
| <b>COMORBIDITIES (hierarchy)</b>       |                                   |        |
| <b>IBD</b>                             | 8,453                             | 26.51% |
| <b>Inflammatory Arthritis</b>          | 2,345                             | 7.35%  |
| <b>Vasculitis and Henoch Schonlein</b> | 795                               | 2.49%  |

|                                             |        |        |
|---------------------------------------------|--------|--------|
| <b>Purpura</b>                              |        |        |
| <b>Hematologic malignancy and Dyscrasia</b> | 886    | 2.78%  |
| <b>Others</b>                               | 19,405 | 60.86% |

---

**COMPLICATIONS / ASSOCIATED DIAGNOSES AND OUTCOMES**

---

|                                                |        |         |
|------------------------------------------------|--------|---------|
| <b>Sepsis</b>                                  | 2,136  | 6.70%   |
| <b>Systemic inflammatory response syndrome</b> | 1,628  | 5.10%   |
| <b>Stoma complications</b>                     | 1,754  | 5.50%   |
| <b>Post Surgical Complication</b>              | 267    | 0.84%   |
| <b>Wound Infection</b>                         | 31,885 | 100.00% |
| <b>Cellulitis</b>                              | 8,598  | 26.96%  |
| <b>Chronic Wound</b>                           | 8,872  | 27.82%  |
| <b>Mortality</b>                               | 731    | 2.30%   |
| <b>Length of Stay (mean, SE)</b>               | 8.15   | 0.14    |
| <b>Cost (mean, SE)</b>                         | 13,159 | 300     |

---

**PROCEDURES**

---

|                          |        |        |
|--------------------------|--------|--------|
| <b>Skin graft</b>        | 898    | 2.82%  |
| <b>Skin biopsy</b>       | 3,834  | 12.02% |
| <b>Debridement</b>       | 3,518  | 11.03% |
| <b>None of the above</b> | 24,913 | 78.14% |

---

**SKIN BIOPSY PROCEDURE VOLUME**

---

|                               |        |        |
|-------------------------------|--------|--------|
| <b>None</b>                   | 1,509  | 4.73%  |
| <b>Low (1-10 per year)</b>    | 11,783 | 36.95% |
| <b>High (&gt;10 per year)</b> | 18,593 | 58.31% |

---

**AHRQ ELIXHAUSER COMORBIDITIES**

---

|                                                         |       |        |
|---------------------------------------------------------|-------|--------|
| <b>AIDS</b>                                             | 51    | 0.16%  |
| <b>Alcohol abuse</b>                                    | 613   | 1.94%  |
| <b>Anemia</b>                                           | 9,186 | 29.05% |
| <b>Rheumatoid arthritis / collagen vascular disease</b> | 3,640 | 11.51% |
| <b>Chronic blood loss</b>                               | 859   | 2.72%  |
| <b>Congestive heart failure</b>                         | 2,891 | 9.14%  |
| <b>Chronic lung disease</b>                             | 5,199 | 16.44% |
| <b>Coagulopathy</b>                                     | 1,495 | 4.73%  |
| <b>Depression</b>                                       | 4,184 | 13.23% |

|                                            |        |        |
|--------------------------------------------|--------|--------|
| <b>Diabetes mellitus</b>                   | 5,806  | 18.36% |
| <b>Diabetes with chronic complications</b> | 1,899  | 6.00%  |
| <b>Drug abuse</b>                          | 1,339  | 4.23%  |
| <b>Hypertension</b>                        | 13,652 | 43.16% |
| <b>Hypothyroidism</b>                      | 3,271  | 10.34% |
| <b>Liver disease</b>                       | 1,299  | 4.11%  |
| <b>Lymphoma</b>                            | 210    | 0.66%  |
| <b>Fluid and electrolyte disorders</b>     | 7,869  | 24.88% |
| <b>Metastatic cancer</b>                   | 297    | 0.94%  |
| <b>Neurological disease</b>                | 1,501  | 4.75%  |
| <b>Paralysis</b>                           | 457    | 1.45%  |
| <b>Obesity</b>                             | 3,891  | 12.30% |
| <b>Peripheral vascular disease</b>         | 2,349  | 7.43%  |
| <b>Psychoses</b>                           | 1,246  | 3.94%  |
| <b>Pulmonary circulation disorders</b>     | 483    | 1.53%  |
| <b>Renal failure</b>                       | 2,895  | 9.15%  |
| <b>Solid tumor without metastasis</b>      | 427    | 1.35%  |
| <b>Peptic ulcer disease</b>                | 78     | 0.25%  |
| <b>Valvular disease</b>                    | 1,291  | 4.08%  |
| <b>Weight loss</b>                         | 2,467  | 7.80%  |

---
